# Supplementary material for: Amine-assisted catechol-based nanocoating on ultrasmall iron oxide nanoparticles for high-resolution T1 angiography
Source: Royal Society of Chemistry journal article supplement (doi:10.1039/d2na00861k), 2023-01-01
Supplement: d2na00861k1.pdf [file d2na00861k1.pdf]

## Supporting Information

### **Amine-assisted catechol-based nanocoating on ultrasmall iron oxide nanoparticles for high-resolution $T_1$ angiography**

Hyunhong Kim,<sup>a</sup> Sunyoung Woo,<sup>a</sup> Hoesu Jung,<sup>b</sup> Hyo-Suk Ahn,<sup>c</sup> Ning Chen,<sup>a</sup> HyungJoon Cho<sup>\*d</sup> and Jongnam Park<sup>\*a,d</sup>

a. School of Energy and Chemical Engineering

Ulsan National Institute of Science and Technology

Unist-gil 50 (100 Banyeon-ri), Eonyang-eup, Uljugun, Ulsan Metropolitan City, Republic of Korea 689-798

E-mail: [jnpark@unist.ac.kr](mailto:jnpark@unist.ac.kr).

b. Preclinical Research Center, Daegu-Gyeongbuk Medical Innovation Foundation (KMEDihub), Daegu, South Korea

c. Division of Cardiology, Department of Internal medicine, The Catholic University of Korea, Uijeongbu St. Mary's Hospital, Uijeongbu, Korea, Catholic Research Institute for Intractable Cardiovascular Disease (CRID), College of Medicine, The Catholic University of Korea, Seoul, Republic of Korea

d. Department of Biomedical Engineering

Ulsan National Institute of Science and Technology

Unist-gil 50 (100 Banyeon-ri), Eonyang-eup, Uljugun, Ulsan Metropolitan City, Republic of Korea 689-798

E-mail: [hjcho@unist.ac.kr](mailto:hjcho@unist.ac.kr).

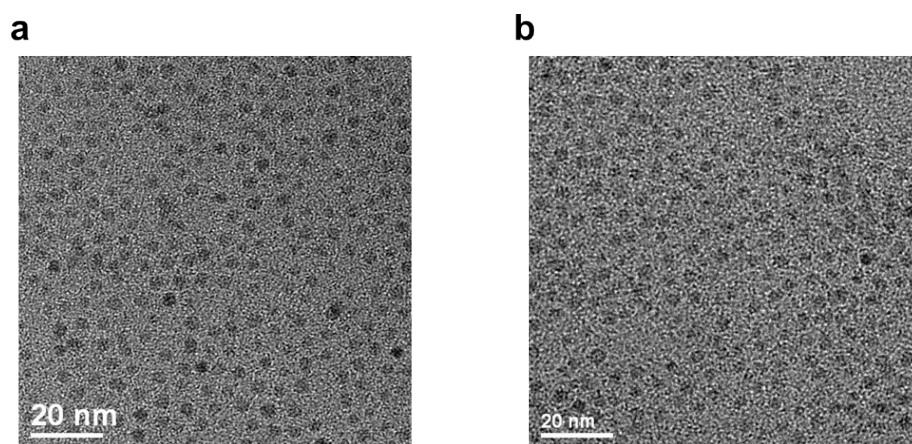

**Fig. S1** TEM image of (a) oleic acid capped 3 nm-sized IONPs, and (b) MCP coated 3 nm-sized IONPs by assistance of AEE.

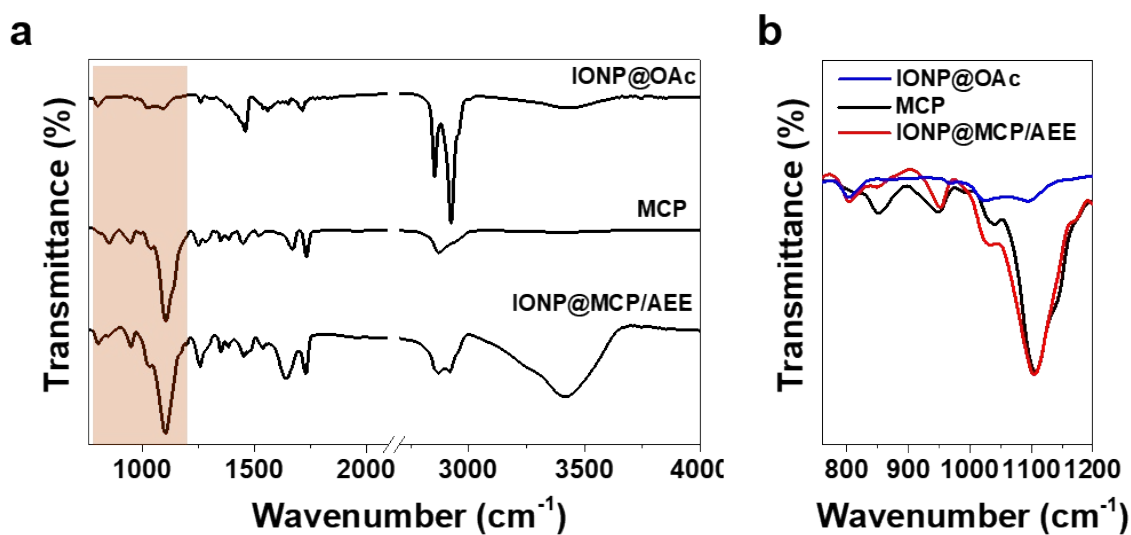

**Fig. S2** (a) FT-IR spectra of as-syn IONPs, MCP, and IONP@MCP/AEE and (b) enlarged FT-IR spectra of reddish boxed window of (a) spectra.

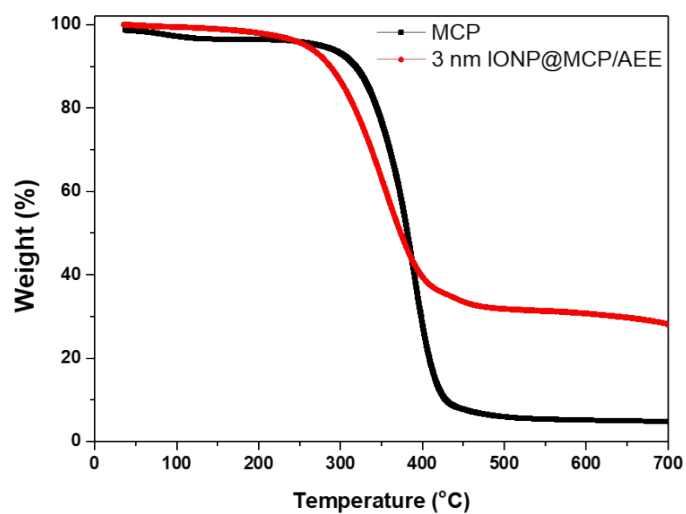

**Fig. S3** TGA data of 3 nm sized IONP@MCP/AEE and MCP.

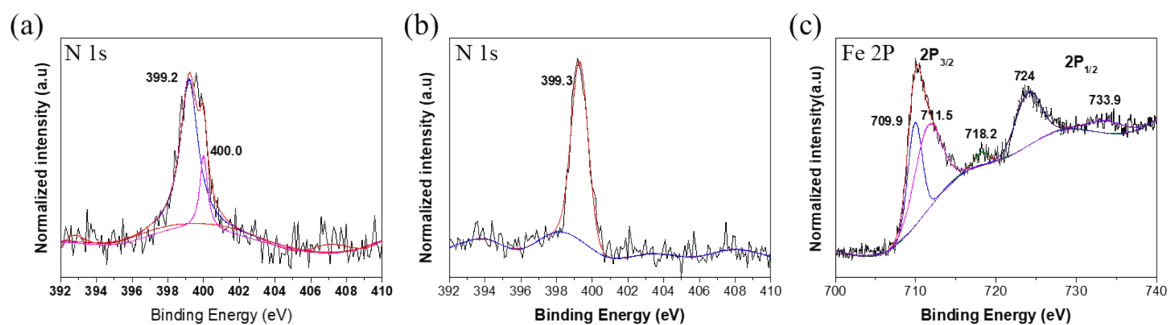

**Fig. S4** N 1s XPS spectra of (a) IONP@MCP/AEE and (b) MCP. (c) Fe 2P spectra of IONP@MCP/AEE.

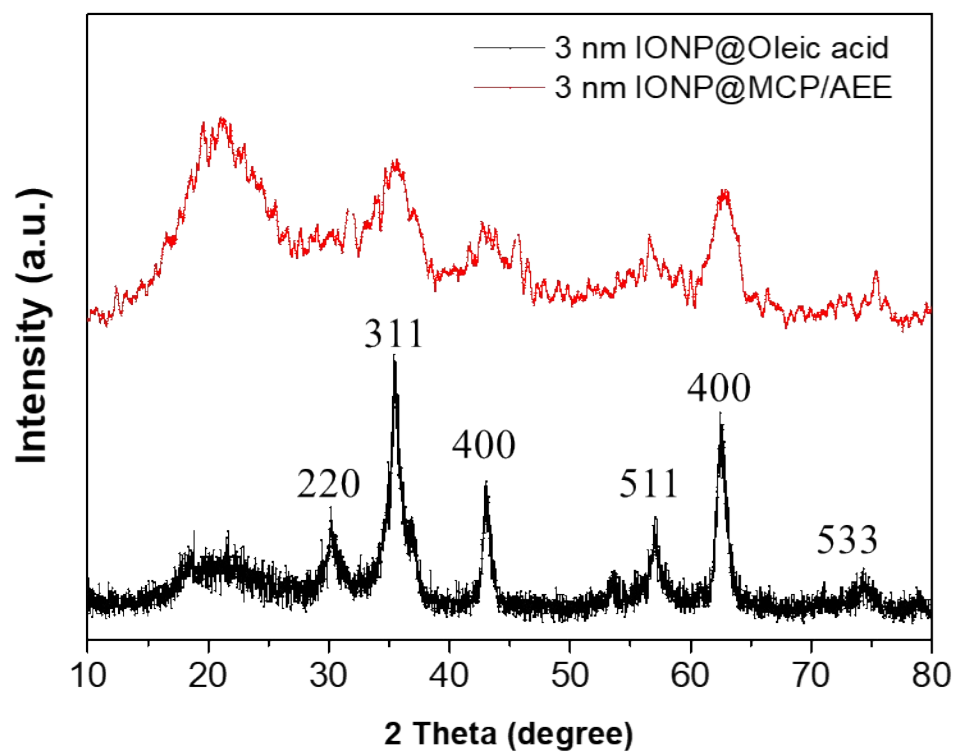

**Fig. S5** XRD patterns of 3 nm sized IONPs@Oleic acid and 3 nm sized IONP@MCP/AEE.

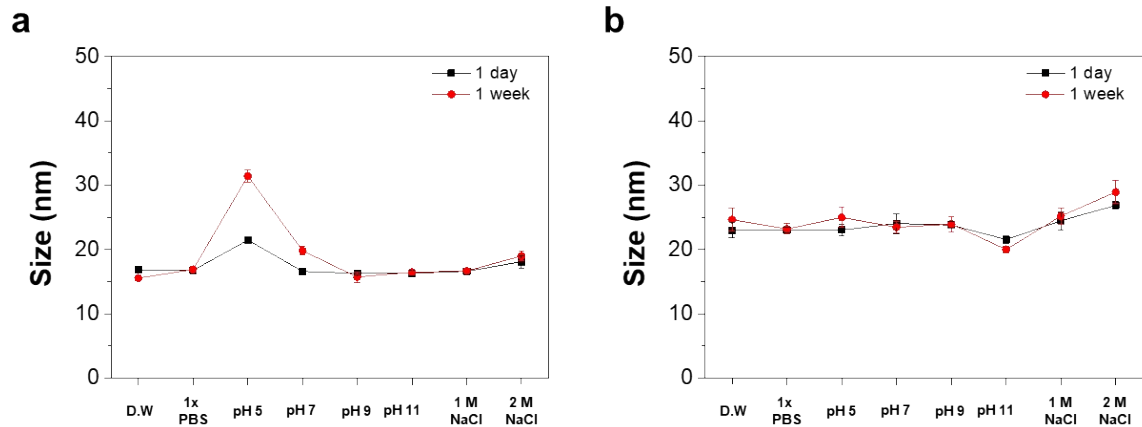

**Fig. S6** Stability measurement of MCP nanocoated (a) 8.5 nm and (b) 12 nm-sized IONPs by DLS in the wide range of pH and salt concentration.

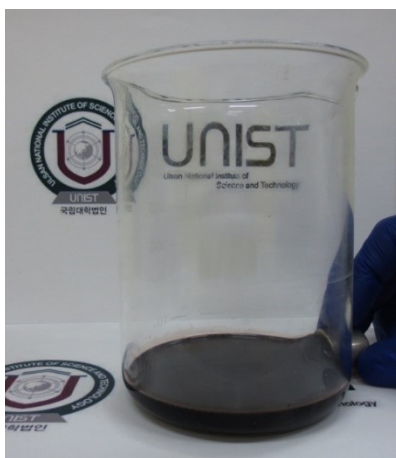

**Fig. S7** Photograph showing the water dispersed MCP coated IONPs obtained by a single-batch reaction.

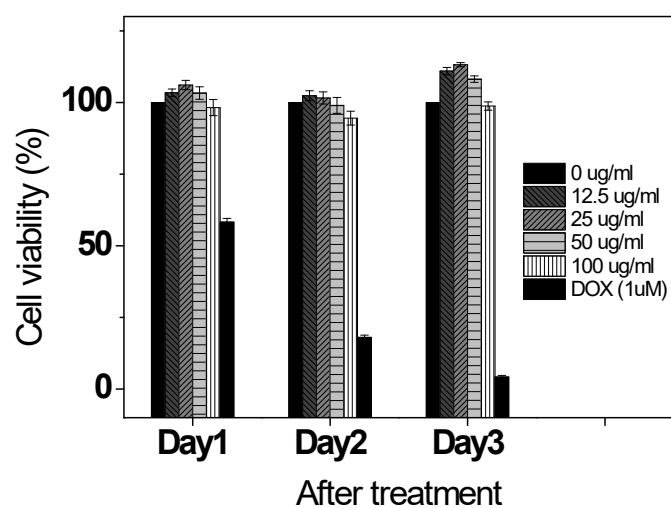

**Fig. S8** Cytotoxicity of IONP@MCP using CCK-8 assay. The viability of the HeLa cells was evaluated with various concentration of IONPs and time.

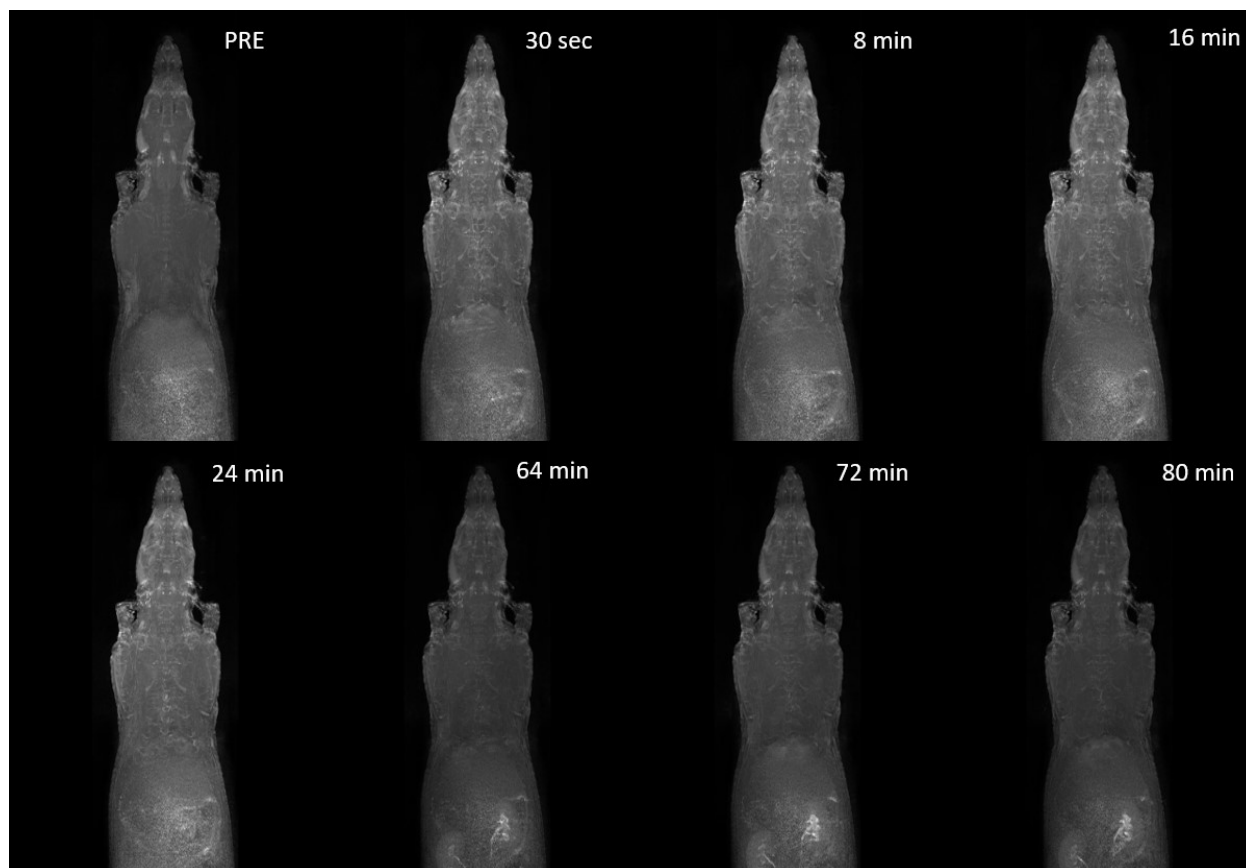

**Fig. S9** DOTAREM enhanced 2D-MIP angiography with a dynamic time-resolved MR sequence. 100  $\mu\text{mol/kg}$  of Gd-DOTA is injected at rats.

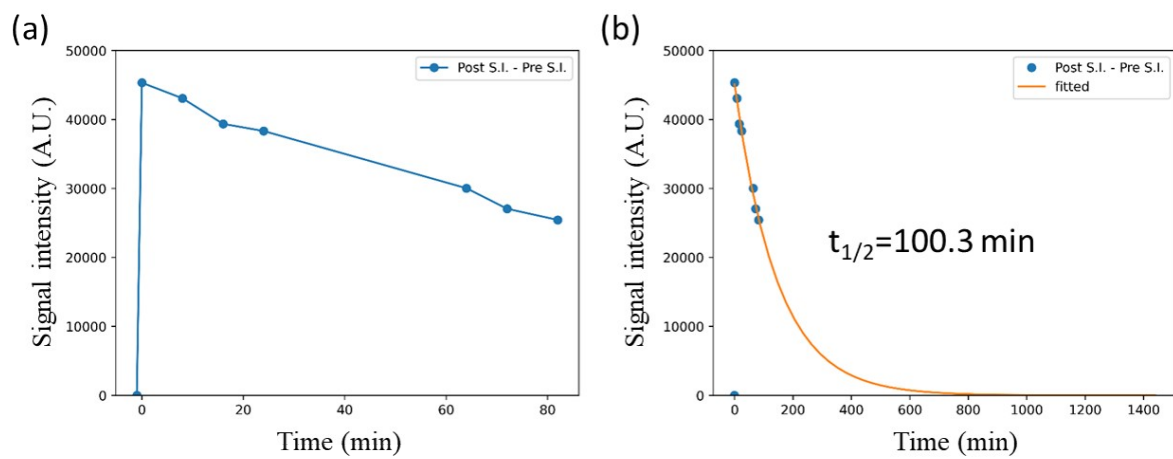

**Fig. S10** (a) Average T1 signal intensity over the vessel area in each time frame. (b) Fitted signal intensities using exponential functions.

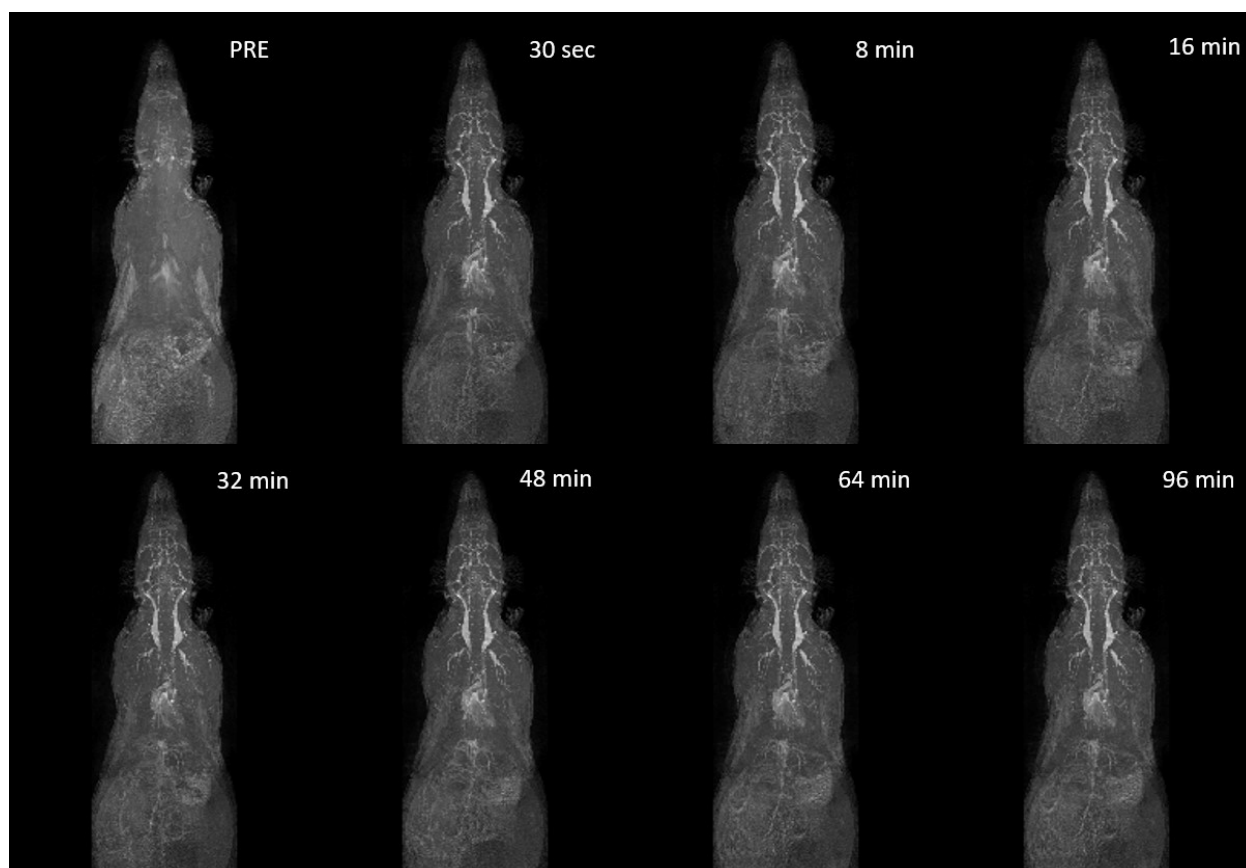

**Fig. S11** SPION enhanced 2D-MIP angiography with a dynamic time-resolved MR sequence.

2.5 mg Fe/kg of sample is injected at rats
